# Supplementary material for: Sex Assigned at Birth Ratio Among Transgender and Gender Diverse Adolescents in the United States
Source: Oxford University Press journal article supplement (doi:10.1542/peds.2022-056567), 2022-08-03
Supplement: peds_2022056567supplementarydata.pdf [file peds_2022056567supplementarydata.pdf]

## Supplemental Information

### **SUPPLEMENTAL TABLE 5** Gender Identity and Sex Assigned at Birth Questions, YRBS 2017 and 2019

---

Some people describe themselves as transgender when their sex at birth does not match the way they think or feel about their gender. Are you transgender?

- A. No, I am not transgender
- B. Yes, I am transgender
- C. I am not sure if I am transgender
- D. I do not know what this question is asking

What is your sex?

- A. Male
  - B. Female
-
